# Supplementary material for: The Functional and Physicochemical Properties of Rice Protein Concentrate Subjected to Acetylation
Source: MDPI journal article supplement (doi:10.3390/molecules28020770), 2023-01-12
Supplement: s1 [file s1]

**Table S1.** Amino acid concentration (g/100 g protein) in native and acetylated PPC.

| Amino Acids       | Native RPC                | Anhydride-to-Protein Ratio (mL/g) |                           |                           |
|-------------------|---------------------------|-----------------------------------|---------------------------|---------------------------|
|                   |                           | 0.4                               | 1.0                       | 2.0                       |
| IAA *             |                           |                                   |                           |                           |
| Leucine           | 6.53 ± 0.53 <sup>a</sup>  | 6.58 ± 0.03 <sup>a</sup>          | 6.21 ± 0.31 <sup>a</sup>  | 6.70 ± 0.21 <sup>a</sup>  |
| Isoleucine        | 3.89 ± 0.04 <sup>a</sup>  | 3.87 ± 0.02 <sup>a</sup>          | 8.82 ± 0.02 <sup>a</sup>  | 4.07 ± 0.19 <sup>a</sup>  |
| Methionine        | 2.60 ± 0.11 <sup>a</sup>  | 2.52 ± 0.01 <sup>a</sup>          | 2.47 ± 0.04 <sup>a</sup>  | 2.65 ± 0.16 <sup>a</sup>  |
| Cysteine          | 2.58 ± 0.12 <sup>a</sup>  | 2.55 ± 0.07 <sup>a</sup>          | 2.57 ± 0.08 <sup>a</sup>  | 2.78 ± 0.22 <sup>a</sup>  |
| Phenylalanine     | 4.89 ± 0.10 <sup>a</sup>  | 4.81 ± 0.01 <sup>a</sup>          | 4.74 ± 0.05 <sup>a</sup>  | 5.04 ± 0.27 <sup>a</sup>  |
| Threonine         | 3.84 ± 0.18 <sup>a</sup>  | 3.70 ± 0.00 <sup>a</sup>          | 3.70 ± 0.05 <sup>a</sup>  | 3.94 ± 0.22 <sup>a</sup>  |
| Lysine            | 3.43 ± 0.06 <sup>a</sup>  | 3.34 ± 0.03 <sup>a</sup>          | 3.31 ± 0.03 <sup>a</sup>  | 3.47 ± 0.10 <sup>a</sup>  |
| Tyrosine          | 4.44 ± 0.09 <sup>a</sup>  | 4.42 ± 0.03 <sup>a</sup>          | 4.32 ± 0.04 <sup>a</sup>  | 4.61 ± 0.25 <sup>a</sup>  |
| Valine            | 7.14 ± 0.02 <sup>a</sup>  | 7.12 ± 0.04 <sup>a</sup>          | 7.08 ± 0.07 <sup>a</sup>  | 7.47 ± 0.34 <sup>a</sup>  |
| DAA **            |                           |                                   |                           |                           |
| Aspartic acid     | 8.90 ± 0.24 <sup>a</sup>  | 8.72 ± 0.04 <sup>a</sup>          | 8.53 ± 0.08 <sup>a</sup>  | 9.06 ± 0.45 <sup>a</sup>  |
| Glutamic acid     | 17.05 ± 1.36 <sup>a</sup> | 17.73 ± 0.18 <sup>a</sup>         | 15.87 ± 0.67 <sup>a</sup> | 16.32 ± 0.14 <sup>a</sup> |
| Serine            | 5.45 ± 0.31 <sup>a</sup>  | 5.27 ± 0.04 <sup>a</sup>          | 5.17 ± 0.02 <sup>a</sup>  | 5.48 ± 0.28 <sup>a</sup>  |
| Glycine           | 4.57 ± 0.22 <sup>a</sup>  | 4.53 ± 0.01 <sup>a</sup>          | 4.39 ± 0.03 <sup>a</sup>  | 4.65 ± 0.18 <sup>a</sup>  |
| Alanine           | 6.14 ± 0.32 <sup>a</sup>  | 6.05 ± 0.02 <sup>a</sup>          | 5.81 ± 0.16 <sup>a</sup>  | 6.25 ± 0.23 <sup>a</sup>  |
| Histidine         | 2.21 ± 0.09 <sup>a</sup>  | 2.18 ± 0.02 <sup>a</sup>          | 2.12 ± 0.07 <sup>b</sup>  | 2.14 ± 0.09 <sup>b</sup>  |
| Arginine          | 6.87 ± 0.17 <sup>a</sup>  | 6.79 ± 0.01 <sup>a</sup>          | 6.66 ± 0.01 <sup>a</sup>  | 7.04 ± 0.37 <sup>a</sup>  |
| Proline           | 1.50 ± 0.11 <sup>a</sup>  | 1.91 ± 0.17 <sup>a</sup>          | 1.40 ± 0.01 <sup>a</sup>  | 0.85 ± 0.13 <sup>a</sup>  |
| Total amino acids | 92.03 ± 3.86 <sup>a</sup> | 92.11 ± 0.35 <sup>a</sup>         | 88.17 ± 0.66 <sup>a</sup> | 95.52 ± 3.55 <sup>a</sup> |

values are means ± standard deviation;  $n = 3$ ; <sup>a,b</sup>—the same letter in verse mean homogenous group; IAA \*—indispensable amino acids; DAA \*\*—dispensable amino acids.

**Table S2.** Results of the foam stability (FS, %) at different pH of native and acetylated RPC.

| Foam Stability (%)                |        |        |         |      |
|-----------------------------------|--------|--------|---------|------|
| Type of Preparation               | Time   | 2      | pH<br>8 | 12   |
| Native RPC                        | 5 min  | 16     | 21      | 27.5 |
|                                   | 10 min | 15.5   | 16      | 25.5 |
|                                   | 30 min | 14.5   | 6.5     | 22.5 |
|                                   | 60 min | 7      | 5.5     | 17   |
| Anhydride-to-Protein Ratio (mL/g) | 0.4    | 5 min  | 7.5     | 8.5  |
|                                   |        | 10 min | 6.5     | 8    |
|                                   |        | 30 min | 5       | 5.5  |
|                                   |        | 60 min | 5       | 4.5  |
|                                   | 1.0    | 5 min  | 5.5     | 6.5  |
|                                   |        | 10 min | 4.5     | 6    |
|                                   |        | 30 min | 3.5     | 5    |
|                                   |        | 60 min | 2.5     | 0.5  |
|                                   | 2.0    | 5 min  | 6.5     | 5    |
|                                   |        | 10 min | 5.5     | 3    |
|                                   |        | 30 min | 5       | 1    |
|                                   |        | 60 min | 2.5     | 0    |

RPC—rice protein concentrate; 0.4, 1.0, 2.0—rice protein preparations after acetylation conducted with different concentrations of acetic anhydride.
